# Supplementary material
Source: HighWire-hosted journal article supplement (https://jnm.snmjournals.org/highwire/filestream/94135/field_highwire_adjunct_files/0/jnm071324_Supplemental_Figures.pdf)
Supplement: jnm071324_Supplemental_Figures.pdf [file jnm071324_Supplemental_Figures.pdf]

A.

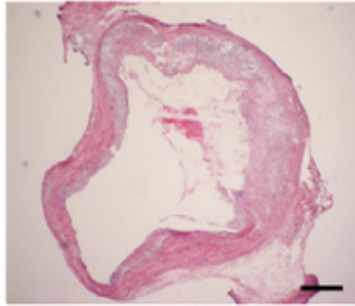

B.

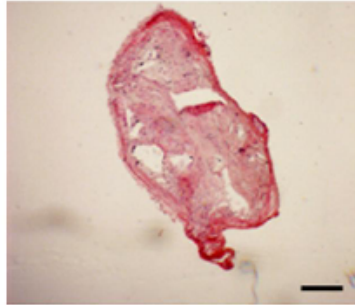

**Supplemental Figure 1.** H&E staining of atherosclerotic artery sections. *ApoE*<sup>-/-</sup> mice were fed a Western diet for 25 weeks. Sections of their ascending aorta and brachiocephalic arteries were prepared and stained with hematoxylin and eosin. Consecutive sections were used for Mac-3 histochemistry or autoradiography (Fig. 4). Bar = 100  $\mu$ m.

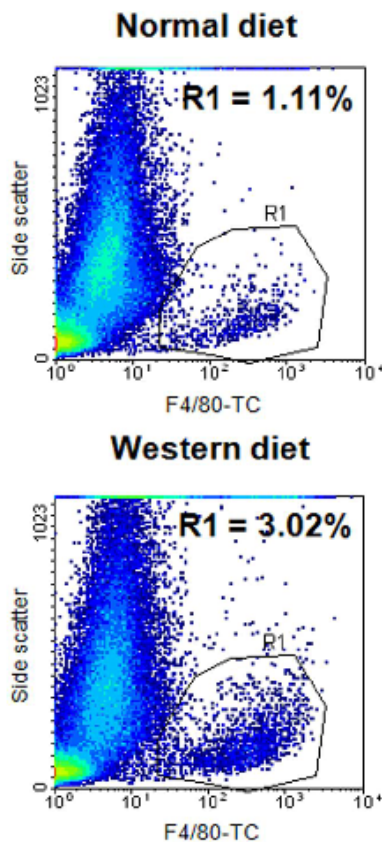

**Supplemental Figure 2.** Percentage increase in total macrophage numbers in *apoE*<sup>-/-</sup> mice on a Western diet. *ApoE*<sup>-/-</sup> mice were fed a normal (upper panel) or Western diet (lower panel) for a period of 25 weeks. Mice were euthanized and thoracic aortas excised and digested with collagenase and elastase. The resulting cell suspensions were analyzed by flow cytometry after incubation with Tri-color conjugated F4/80 antibody.
